# Supplementary material
Source: publisher figshare collection journal article supplement (https://acs.figshare.com/ndownloader/files/4719214)

# Characterization of the binding of isoniazid and analogs to *M. tuberculosis* catalase-peroxidase (KatG)

Xiangbo Zhao, Shengwei Yu, and Richard S. Magliozzo\*

**Figure S1: The optical absorbance spectra of KatG before and after INH titration.** Spectra of freshly prepared KatG (A) or KatG after 3 weeks of storage (B) were recorded before and after INH titration. The inset graphs show the enlarged Soret region. The dilution factor is negligible since only very small volume change occurred during the titration. KatG (5  $\mu$ M) was in phosphate buffer, pH7.2.

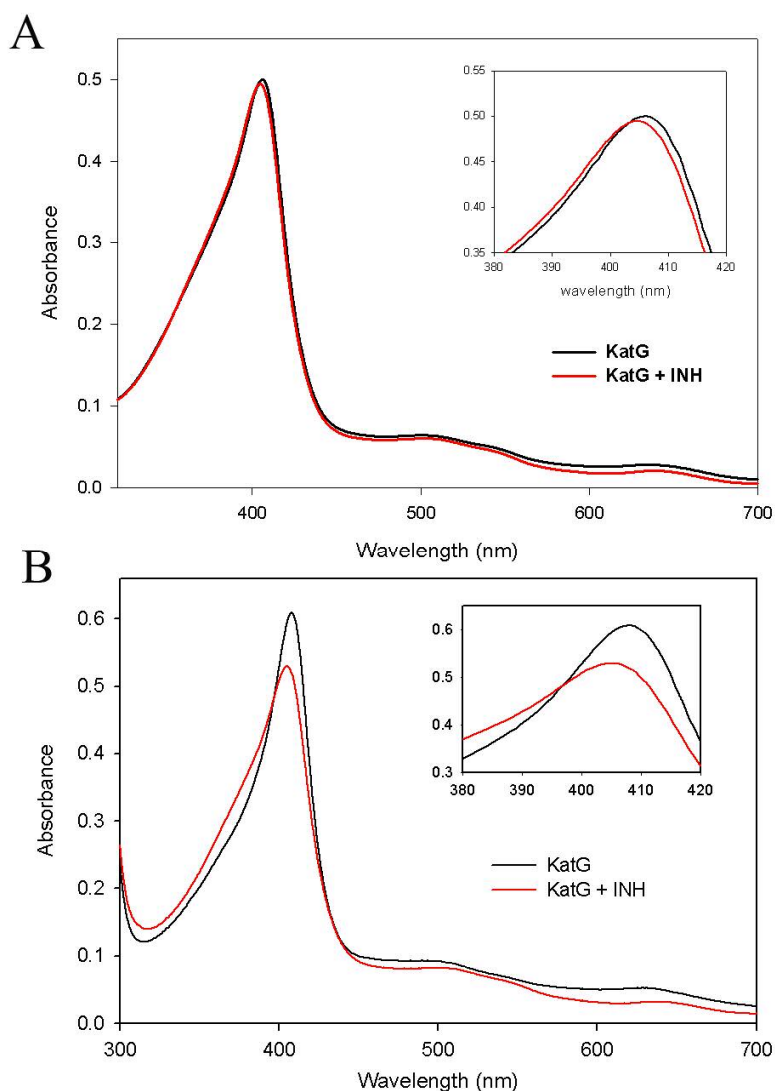

Supplement: Supplementary file 1 [file 4719214]
